# Supplementary material
Source: PubMed Central journal article supplement (PMC3195620)
Supplement: supp_M111.273276_jbc.M111.273276-1.pdf [file supp_M111.273276_jbc.M111.273276-1.pdf]

## Seok et al., Suppl. Fig. S1

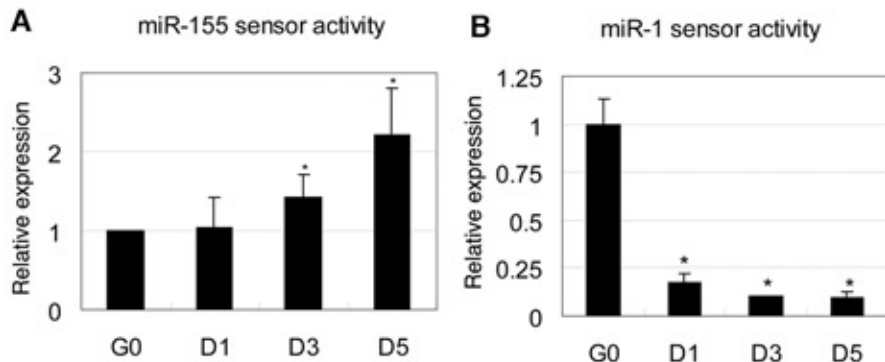

**Fig. S1** Measurement of miR-155 level using a luciferase sensor. miR-155 sensor (and miR-1 sensor to serve as a positive control) were transfected into C2C12 cells. Cells were induced to differentiate at indicated dates and luciferase activity measured. Results were presented as relative luciferase activity in which the control was assigned a value of 1. Data represent the mean + s.d. from at least three independent experiments in triplicate. \* $P < 0.05$ .

## Seok et al., Suppl. Fig. S2

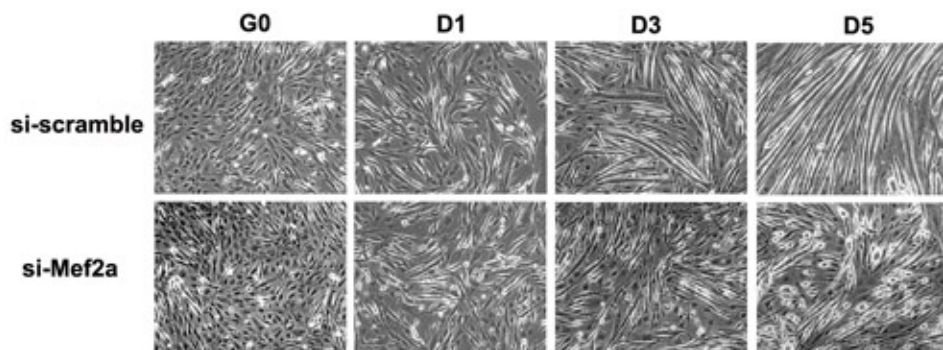

**Fig. S2** Morphology of C2C12 cells treated with either control or MEF2A specific siRNAs. Cells were induced to differentiate at different time courses (differentiation day1, day3 and day5) and cell morphology was documented by representative phase contrast images.

## Seok et al., Suppl. Fig. S3

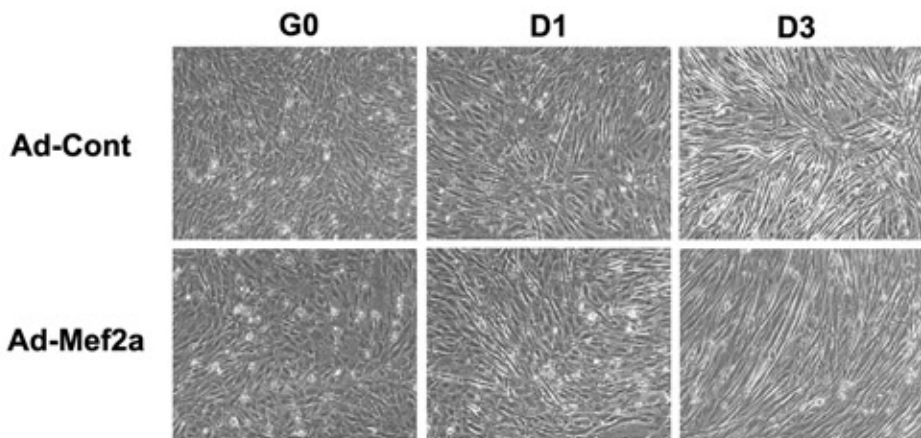

**Fig. S3** Morphology of C2C12 cells treated with either control vector or ad-MEF2A. Cells were induced to differentiate at different time courses (differentiation day1, day3 and) and cell morphology was documented by representative phase contrast images.

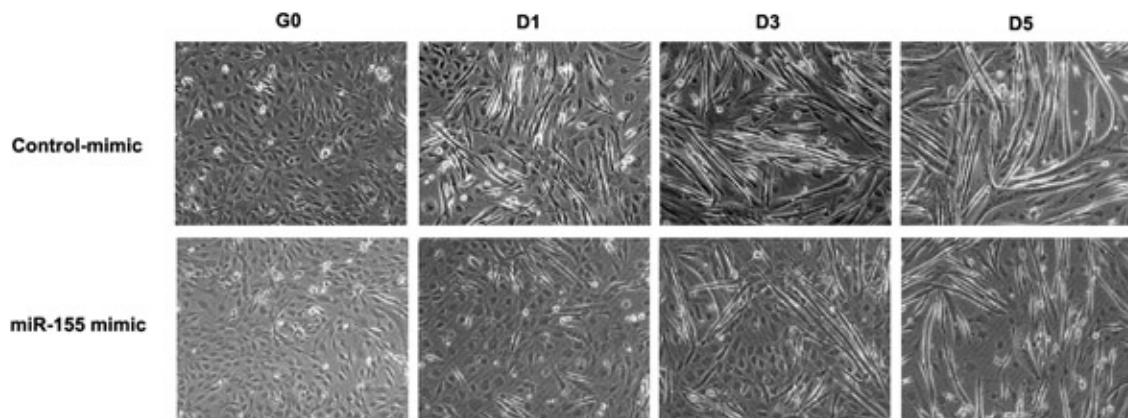

**Fig. S4** Morphology of C2C12 cells treated with either control miRNA or miR-155 mimic. Cells were induced to differentiate at different time courses (differentiation day1, day3 and day5) and cell morphology was documented by representative phase contrast images.

Control

miR-19a

miR-296

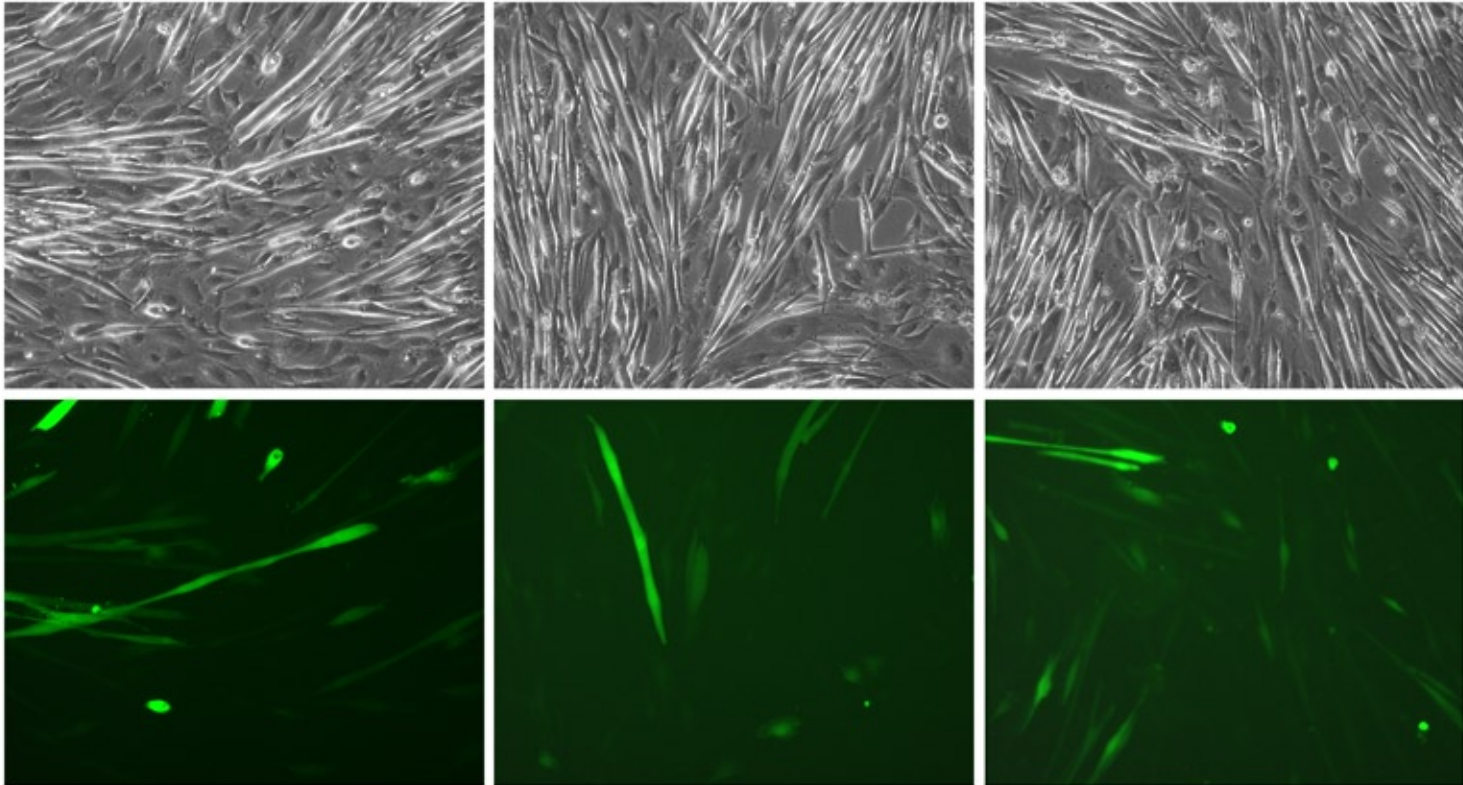

**Fig. S5** C2C12 cells were transfected with either control, miR-19a or miR-296. Cells were induced to differentiate for 2 days and cell morphology was documented (Upper panels). Myogenic differentiation was document by myosin heavy chain staining (lower panels).
